# Supplementary material
Source: Springer Nature journal article supplement (https://www.springermedizin.de/resource/supplementary/12968_2009_526_MOESM1_ESM.pdf/9579178)

### AORTA

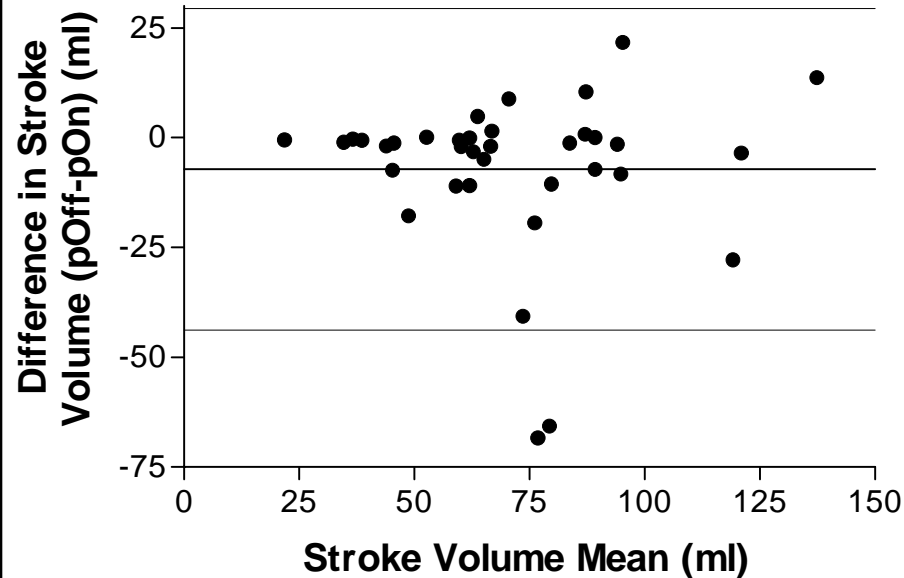

### RVOT

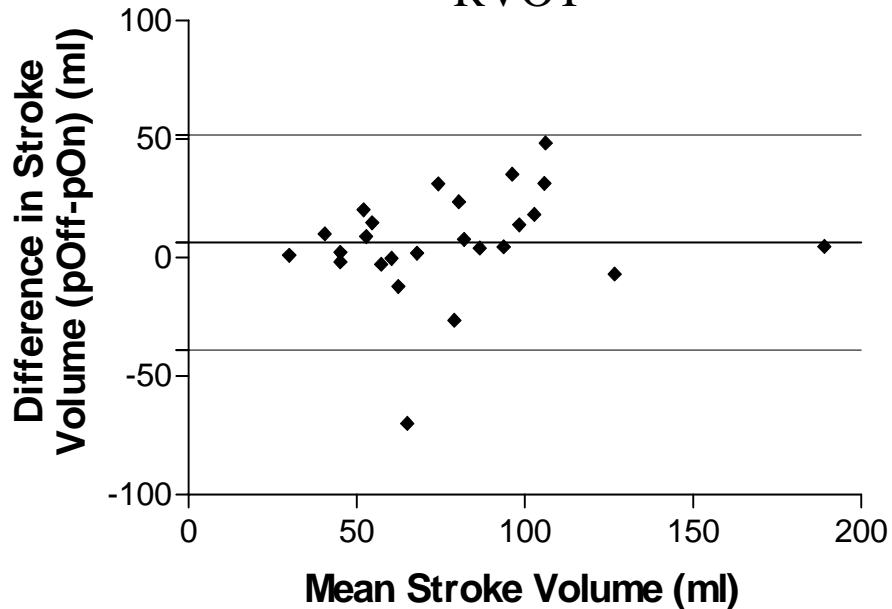

Supplement: MOESM1 [file 9579178]
